# Supplementary material for: Pilot Study of Electronic Nicotine Delivery Systems (ENDS) Cessation Methods
Source: Preprints.org preprint supplement (doi:10.20944/preprints202012.0233.v1), 2020-12-09
Supplement: Supplementary file 3 [file supplementary]

**Supplemental Table 1: Behavioral Support Question Prompts Administered to Study Participants by Pharmacists**

| Appointment | Question Prompt |
| --- | --- |
| **Initial appointment** | |
|  | 1. Why do you want to quit vaping?  2. What do you think will be the biggest challenge for you to quit vaping?  3. What can you do to avoid/change that? |
| **Phone calls at 2-, 6-, 10-weeks** | |
|  | 1. What do you think has made you successful at quitting?  2. What do you think will be the biggest challenge for you to quit vaping?  3. What can you do to avoid/change that? |
| **In-person appointments at 4-, 8-, 12-weeks** | |
|  | 1. What is your overall impression of this quit attempt?  2. What has been the biggest challenge for you to quit vaping?  3. What have you done to overcome that?  4. How has quitting vaping changed your life over the past month? |
| **Phone call at 6 months** | |
|  | 1. What has been the biggest challenge for you to quit vaping?  2. What have you done to overcome that?  3. How has quitting vaping changed your life over the past six months?  4. What do you think will be the biggest challenge for you to stay vape & tobacco free in the future?  5. What will you do to overcome those challenges? |

**Supplemental Table 2: Pre-post Comparison of Dependence and Vitals within Study Arms**

|  | Baseline | 12-week appointment | Difference | P-value |
| --- | --- | --- | --- | --- |
| **Nicotine Replacement Therapy + Behavioral support (n=7)** | | | | |
| Mean mFTND score (SD) | 4.57 (3.1) | 1.00 (1.41) | -3.57 | 0.041 |
| Mean Systolic blood pressure (SD), mmHg | 132.4 (6.84) | 136.20 (13.04) | 3.8 | 0.482 |
| Mean heart rate (SD), bpm | 76.40 (16.26) | 71.40 (17.60) | -5.00 | 0.297 |
| Mean Weight (SD), lbs | 200.24 (52.65) | 205.80 (46.86) | 5.56 | 0.185 |
| **Vape-taper + Behavioral support (n=8)** | | | | |
| Mean mFTND score (SD) | 5.38 (2.62) | 0.33 (0.82) | -5.05 | 0.027 |
| Mean Systolic blood pressure (SD), mmHg | 128.0 (19.43) | 129.33 (13.16) | 1.33 | 0.836 |
| Mean heart rate (SD), bpm | 76.00 (18.02) | 71.83 (12.83) | -4.17 | 0.578 |
| Mean Weight (SD), lbs | 183.90 (30.68) | 185.00 (31.73) | 1.1 | 0.706 |
| **Self-guided (n=9)** | | | | |
| Mean mFTND score (SD) | 6.11 (1.69) | 1.11 (2.26) | -5.00 | 0.007 |
| Mean Systolic blood pressure (SD), mmHg | 133.25 (5.39) | 127.88 (6.94) | -5.37 | 0.090 |
| Mean heart rate (SD), bpm | 75.63 (14.32) | 75.63 (19.62) | 0 | 1 |
| Mean Weight (SD), lbs | 167.00 (41.38) | 171.88 (38.81) | 4.88 | 0.052 |

mFTND= modified Fagerstrom Test for Nicotine Dependence

**Supplemental Table 3: Frequencies of Participant-Perceived Effects and Withdrawals by Study Arm**

| Categorya | Nicotine Replacement Therapy + Behavioral support (n=7) | Vape-taper **+** Behavioral support  (n=8) | Self-guided (n=9) |
| --- | --- | --- | --- |
| Positive benefits experienced from initial to 4 week appointment | 16 | 16 | 17 |
| Positive benefits experienced from 4 weeks to 12 weeks | 8 | 20 | 14 |
| Negative effects experienced from initial to 4 week appointment | 15 | 12 | 32 |
| Negative effects experienced from 4 weeks to 12 weeks | 6 | 7 | 16 |

aPositive health effects of quitting were discussed by participants over the study period as the following: improved concentration and focus (20), improved sleeping (20), more energy (9), better breathing and exercise tolerance (8), decreased appetite (8), happier mood (7), clearer skin (5), decreased coughing (4), decreased cravings (3), decreased irritability (2), decreased headaches (2), less anxiety (1), improved smell (1), improved heartburn (1), and less nausea (1). Negative effects that participants experienced during the study period include the following: more irritable or angry (24), increased appetite (20), harder to sit still or concentrate (17), decreased sleep (12), more anxious (3), nicotine cravings (3), worse headaches (3), less energy (2), less motivation (1), more emotional (1), and more mucus production (1).

**Supplemental Figure 1-Participant Flow Chart**
